# Supplementary material for: Ultrafine Pt nanoparticles anchored on core–shell structured zeolite–carbon for efficient catalysis of hydrogen generation
Source: Royal Society of Chemistry journal article supplement (doi:10.1039/d3ra00358b), 2023-01-01
Supplement: d3ra00358b1.pdf [file d3ra00358b1.pdf]

## Supplementary information

### Ultrafine Pt nanoparticles anchored on core-shell structured zeolite-carbon for efficient catalysis of hydrogen generation

Yue-Wei Wei,<sup>a, c</sup> Guang Yang,<sup>c</sup> Xi-Xi Xu,<sup>c</sup> Yan-Yan Liu,<sup>d</sup> Bao-Jun Li<sup>\*b</sup>(iD 0000-0001-8325-3772), Yong-Zhao Wang<sup>\*a</sup>(iD 0000-0001-9389-4784), Yong-Xiang Zhao<sup>\*a</sup>

<sup>a</sup>School of Chemistry and Chemical Engineering, Shanxi University, Taiyuan 030006, China. Engineering Research Center of Ministry of Education for Fine Chemicals, Shanxi University, Taiyuan 030006, China. e-mail: catalyst@sxu.edu.cn (Y. Z. Wang). e-mail: yxzhao@sxu.edu.cn (Y. X. Zhao)

<sup>b</sup>Research Center of Green Catalysis, College of Chemistry, Zhengzhou University, Zhengzhou 450001, China. e-mail: lbjfc@zzu.edu.cn

<sup>c</sup>Tobacco College of Henan Agricultural University, Zhengzhou 450002, China

<sup>d</sup>College of Science, Henan Agricultural University, Zhengzhou 450002, China

Total number of pages: 8

Total number of figures: 6

### **Table of Contents**

|                |    |
|----------------|----|
| Chemicals..... | S3 |
| Fig. S1.....   | S3 |
| Fig. S2.....   | S4 |
| Fig. S3.....   | S4 |
| Fig. S4.....   | S5 |
| Fig. S5.....   | S5 |
| Fig. S6.....   | S6 |
| Table S1.....  | S7 |
| Table S2.....  | S7 |
| Table S3.....  | S7 |

## Experimental section

**Chemicals.** All chemical reagents were obtained commercially and used without further purification. All silicon molecular sieve (S-1), Chloroplatinic acid ( $\text{H}_2\text{PtCl}_6 \cdot 6\text{H}_2\text{O}$ , CSSC), sodium borohydride ( $\text{NaBH}_4$ , Kermel Co., Ltd., China,  $\geq 98.0\%$ ), ammonia borane ( $\text{NH}_3\text{BH}_3$ , Energy Chemical Co., Ltd., 98.0%), sodium hydroxide ( $\text{NaOH}$ , Sinopharm Chemical Reagent Co., Ltd., China,  $\geq 96\%$ ), glucose anhydrous ( $\text{C}_6\text{H}_{12}\text{O}_6$ , Tianjin Fengchuan Chemical Reagent Co., Ltd., China, AR).

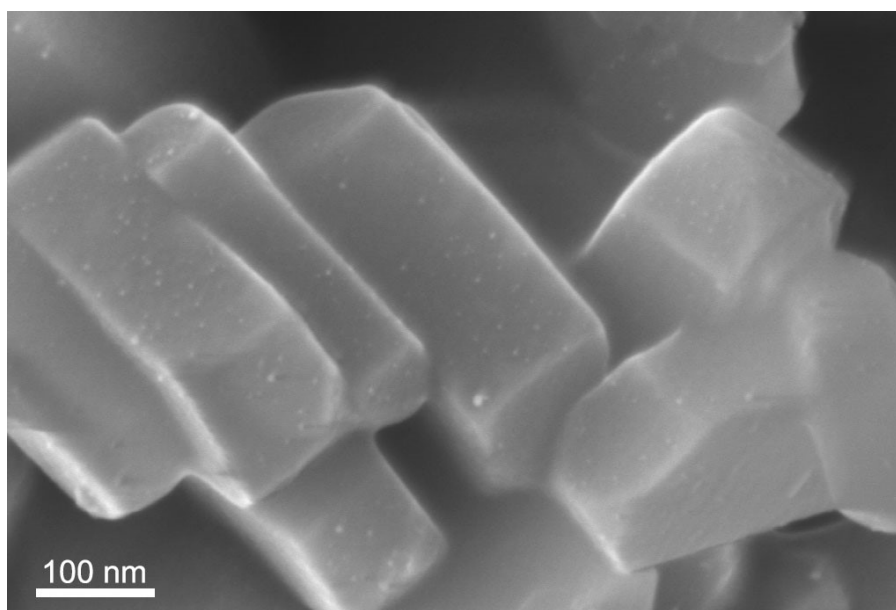

**Fig. S1.** SEM image of PSC-2.

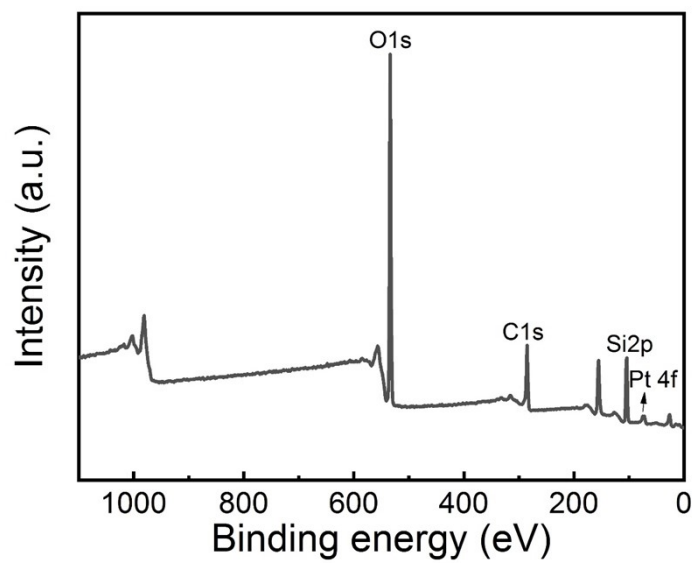

**Fig. S2.** XPS spectral image of RSC-2.

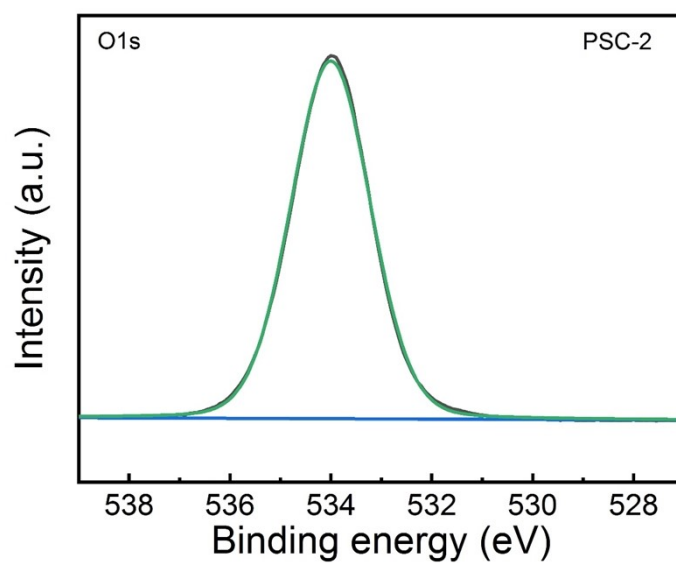

**Fig. S3.** XPS spectral image of O1s.

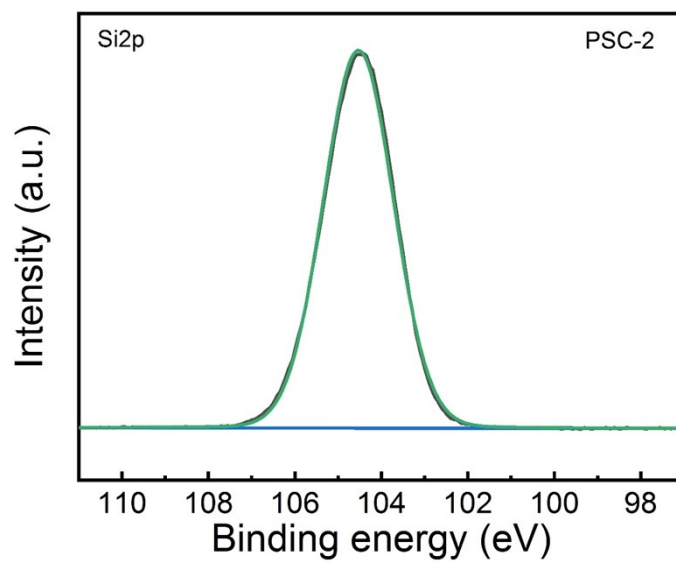

**Fig. S4.** XPS spectral image of Si2p.

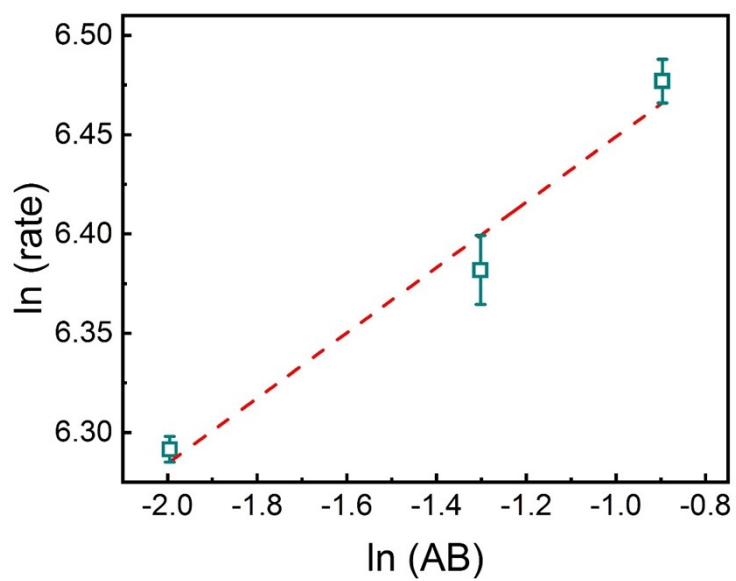

**Fig. S5.** Fitting plot of catalytic rate under different AB concentration conditions.

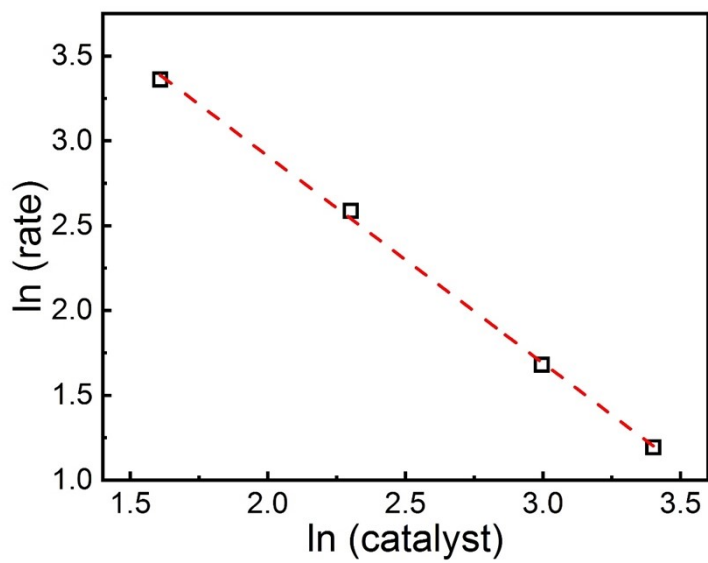

**Fig. S6.** Fitting plot of catalytic rate under different catalyst dosage conditions.

**Table S1**

The integral area values of peaks D and G.

| Peak | Peak area | FWHM  | Peak height | Peak-weighted average center | Percentage of area |
|------|-----------|-------|-------------|------------------------------|--------------------|
| D    | 973943.3  | 208.8 | 4383.0      | 1381.7                       | 54.9               |
| G    | 800490.7  | 120.2 | 6258.3      | 1594.4                       | 45.1               |

**Table S2**

Metal loading of each catalyst measured by ICP-OES.

| Catalyst | Ru loading (wt%) |
|----------|------------------|
| PSC-2    | 1.07             |

**Table S3**

The comparison of TOF and activation energies of various catalysts reported in the literature.

| Catalysts                                     | TOF (min <sup>-1</sup> ) | <i>E<sub>a</sub></i> (kJ/mol) | References |
|-----------------------------------------------|--------------------------|-------------------------------|------------|
| Pt/S-1@C                                      | 593                      | 44                            | This work  |
| Pt@SiO <sub>2</sub>                           | 159                      | 54                            | 1          |
| Pt@h-mNSiO <sub>2</sub>                       | 372                      | 49                            | 2          |
| Pt-CeO <sub>2</sub> /rGO                      | 94                       | 65                            | 3          |
| Pt/CNT                                        | 100                      | 52                            | 4          |
| Pt@PC-POPs                                    | 56                       | 56                            | 5          |
| BOPs@Pt                                       | 131                      | 44                            | 6          |
| Pt <sub>0.17</sub> Co <sub>0.83</sub> /PEI-GO | 378                      | 52                            | 7          |
| Pt <sub>0.01</sub> Ni <sub>0.99</sub>         | 42                       | 49                            | 8          |

|                          |     |    |    |
|--------------------------|-----|----|----|
| Pt-Ru/PVP                | 308 | 56 | 9  |
| Pt-Pd/PVP                | 125 | 52 | 10 |
| Pt-CoCu@SiO <sub>2</sub> | 273 | 51 | 11 |
| Pt@Co/mCN                | 118 | 45 | 12 |

## References:

- 1 Y. Hu, Y. Wang, Z. Lu, X. Chen and L. Xiong, *Appl Surf Sci*, 2015, **341**, 185–189.
- 2 D. Xu, W. D. Wang, M. Tian and Z. P. Dong, *J Colloid Interf Sci*, 2018, **516**, 407–415.
- 3 Q. Yao, Y. Shi, X. Zhang, X. Chen and Z.-H. Lu, *Chem-asian J*, 2016, **11**, 3251–3257.
- 4 W. Y. Chen, Z. J. Wang, X. Z. Duan, G. Qian, D. Chen and X. G. Zhou, *Chem Eng Sci*, 2018, **192**, 1242–1251.
- 5 H. Zhao, G. Q. Yu, M. Yuan, J. Yang, D. Xu and Z. P. Dong, *Nanoscale*, 2018, **10**, 21466–21474.
- 6 X. Zhao, Y. F. Fu, C. Yao, S. R. Xu, Y. Shen, Q. Ding, W. J. Liu, H. B. Zhang and X. H. Zhou, *Chemcatchem*, 2019, **11**, 2362–2369.
- 7 M. X. Li, J. T. Hu, Z. X. Chen and H. B. Lu, *Rsc Adv*, 2014, **4**, 41152–41158.
- 8 J. Du, F. Y. Cheng, M. Si, J. Liang, Z. L. Tao and J. Chen, *Int J Hydrogen Energ*, 2013, **38**, 5768–5774.
- 9 M. Rakap, *Appl Catal A-gen*, 2014, **478**, 15–20.
- 10 M. Rakap, *J Power Sources*, 2015, **276**, 320–327.
- 11 Y. Z. Ge, Z. H. Shah, X. J. Lin, R. W. Lu, Z. M. Liao and S. F. Zhang, *Acs Sustain Chem Eng*, 2017, **5**, 1675–1684.
- 12 X. L. Cui, H. Li, G. Q. Yu, M. Yuan, J. Yang, D. Xu, Y. M. Hou and Z. P. Dong, *Int J Hydrogen Energ*, 2017, **42**, 27055–27065.
